# Supplementary material
Source: publisher site journal article supplement (https://www.dovepress.com/article/394441)
Supplement: Supplementary file 1 [file get_supplementary_file.php]

**Supplementary Data: Clinical data of all subjects**

| Patient # | Age | Sex    | Eye   | Classification of uveitis | Diagnosis                                     | Number of vitreous hyperreflective particles |     |     |       | Vitreous particle density (particles / $\mu\text{m}^2$ ) | The length of the vitreous p ellipses with smallest size: |    |    |
|-----------|-----|--------|-------|---------------------------|-----------------------------------------------|----------------------------------------------|-----|-----|-------|----------------------------------------------------------|-----------------------------------------------------------|----|----|
|           |     |        |       |                           |                                               | #1                                           | #2  | #3  | Mean  | Mean                                                     | #1                                                        | #2 | #3 |
| 1         | 27  | Male   | Left  | IFU                       | Ocular toxocariasis                           | 26                                           | 26  | 24  | 25.3  | 5.7                                                      | 25                                                        | 29 | 29 |
| 2         | 42  | Male   | Right | IFU                       | Cytomegalovirus retinitis                     | 246                                          | 184 | 269 | 233.0 | 54.4                                                     | 23                                                        | 22 | 26 |
|           |     |        | Left  | IFU                       | Cytomegalovirus retinitis                     | 23                                           | 32  | 40  | 31.7  | 7.0                                                      | 12                                                        | 15 | 10 |
| 3         | 66  | Male   | Left  | IFU                       | Cytomegalovirus retinitis                     | 12                                           | 7   | 20  | 13.0  | 4.2                                                      | 19                                                        | 16 | 16 |
| 4         | 54  | Female | Left  | IFU                       | Varicella zoster virus-associated uveitis     | 127                                          | 139 | 166 | 144.0 | 29.1                                                     | 22                                                        | 22 | 21 |
| 5         | 50  | Male   | Left  | IFU                       | Ocular tuberculosis                           | 32                                           | 40  | 32  | 34.7  | 3.2                                                      | 14                                                        | 17 | 14 |
| 6         | 84  | Female | Left  | IFU                       | Acute retinal necrosis                        | 59                                           | 62  | 64  | 61.7  | 13.9                                                     | 23                                                        | 18 | 23 |
| 7         | 30  | Female | Right | NIGU                      | Unclassified intraocular inflammation         | 11                                           | 15  | 13  | 13.0  | 2.1                                                      | 17                                                        | 13 | 13 |
|           |     |        | Left  | NIGU                      | Unclassified intraocular inflammation         | 22                                           | 31  | 32  | 28.3  | 6.7                                                      | 19                                                        | 26 | 24 |
| 8         | 35  | Female | Right | NIGU                      | Sarcoidosis                                   | 14                                           | 12  | 18  | 14.7  | 3.0                                                      | 17                                                        | 22 | 16 |
|           |     |        | Left  | NIGU                      | Sarcoidosis                                   | 10                                           | 10  | 11  | 10.3  | 1.9                                                      | 25                                                        | 25 | 25 |
| 9         | 31  | Female | Right | NIGU                      | Retinal vasculitis                            | 30                                           | 24  | 19  | 24.3  | 5.9                                                      | 20                                                        | 23 | 21 |
|           |     |        | Left  | NIGU                      | Retinal vasculitis                            | 15                                           | 19  | 15  | 16.3  | 4.3                                                      | 23                                                        | 20 | 29 |
| 10        | 55  | Female | Right | NIGU                      | Vogt-Koyanagi-Harada disease                  | 23                                           | 26  | 26  | 25.0  | 5.4                                                      | 20                                                        | 22 | 25 |
|           |     |        | Left  | NIGU                      | Vogt-Koyanagi-Harada disease                  | 14                                           | 14  | 18  | 15.3  | 3.1                                                      | 22                                                        | 29 | 31 |
| 11        | 69  | Female | Right | NIGU                      | Vogt-Koyanagi-Harada disease                  | 12                                           | 15  | 11  | 12.7  | 2.8                                                      | 19                                                        | 25 | 21 |
|           |     |        | Left  | NIGU                      | Vogt-Koyanagi-Harada disease                  | 26                                           | 27  | 32  | 28.3  | 6.6                                                      | 25                                                        | 25 | 21 |
| 12        | 74  | Female | Right | NIGU                      | Unclassified intraocular inflammation         | 31                                           | 22  | 23  | 25.3  | 6.0                                                      | 20                                                        | 16 | 16 |
|           |     |        | Left  | NIGU                      | Unclassified intraocular inflammation         | 10                                           | 12  | 10  | 10.7  | 1.9                                                      | 22                                                        | 30 | 30 |
| 13        | 68  | Male   | Right | NIGU                      | Unclassified intraocular inflammation         | 20                                           | 20  | 18  | 19.3  | 4.2                                                      | 31                                                        | 30 | 30 |
| 14        | 82  | Female | Left  | NINGU                     | veitis associated with other systemic disease | 14                                           | 15  | 16  | 15.0  | 2.9                                                      | 32                                                        | 39 | 22 |
| 15        | 32  | Female | Right | NINGU                     | Unclassified intraocular inflammation         | 31                                           | 45  | 27  | 34.3  | 8.3                                                      | 18                                                        | 16 | 15 |
| 16        | 44  | Female | Left  | NINGU                     | Unclassified intraocular inflammation         | 22                                           | 16  | 17  | 18.3  | 4.1                                                      | 28                                                        | 17 | 21 |
| 17        | 52  | Male   | Right | NINGU                     | veitis associated with other systemic disease | 6                                            | 8   | 11  | 8.3   | 1.9                                                      | 26                                                        | 31 | 19 |
|           |     |        | Left  | NINGU                     | veitis associated with other systemic disease | 9                                            | 10  | 7   | 8.7   | 2.7                                                      | 19                                                        | 17 | 14 |
| 18        | 64  | Male   | Right | NINGU                     | Unclassified intraocular inflammation         | 6                                            | 8   | 6   | 6.7   | 2.1                                                      | 11                                                        | 11 | 15 |
| 19        | 55  | Male   | Right | NINGU                     | Fuchs' heterochromic iridocyclitis            | 13                                           | 11  | 8   | 10.7  | 2.9                                                      | 31                                                        | 21 | 20 |
| 20        | 69  | Female | Right | NINGU                     | Unclassified intraocular inflammation         | 16                                           | 27  | 17  | 20.0  | 4.6                                                      | 23                                                        | 22 | 16 |
| 21        | 42  | Male   | Right | NINGU                     | Unclassified intraocular inflammation         | 12                                           | 16  | 23  | 17.0  | 3.1                                                      | 23                                                        | 22 | 21 |
|           |     |        | Left  | NINGU                     | Unclassified intraocular inflammation         | 17                                           | 21  | 25  | 21.0  | 5.5                                                      | 21                                                        | 29 | 25 |
| 22        | 58  | Female | Right | NINGU                     | Unclassified intraocular inflammation         | 3                                            | 2   | 5   | 3.3   | 1.0                                                      | 22                                                        | 19 | 26 |
|           |     |        | Left  | NINGU                     | Unclassified intraocular inflammation         | 9                                            | 6   | 4   | 6.3   | 1.7                                                      | 29                                                        | 27 | 23 |
| 23        | 64  | Female | Right | NINGU                     | Unclassified intraocular inflammation         | 7                                            | 8   | 8   | 7.7   | 1.7                                                      | 31                                                        | 33 | 33 |

| article<br>s(μm) | The length of the vitreous particle<br>ellipses with largest sizes(μm) |     |     |       | Vitreous haze<br>grade |
|------------------|------------------------------------------------------------------------|-----|-----|-------|------------------------|
|                  | Mean                                                                   | #1  | #2  | #3    |                        |
| 27.7             | 80                                                                     | 137 | 110 | 109.0 | 2                      |
| 23.6             | 194                                                                    | 204 | 200 | 199.4 | 2                      |
| 12.3             | 137                                                                    | 170 | 110 | 139.0 | 1                      |
| 17.3             | 77                                                                     | 60  | 95  | 77.4  | 1                      |
| 21.6             | 143                                                                    | 155 | 144 | 147.3 | 2                      |
| 15.0             | 77                                                                     | 80  | 77  | 78.0  | 1                      |
| 21.3             | 246                                                                    | 307 | 263 | 272.1 | 3                      |
| 14.3             | 92                                                                     | 104 | 93  | 96.5  | 0.5                    |
| 23.0             | 81                                                                     | 93  | 88  | 87.3  | 2                      |
| 18.5             | 106                                                                    | 93  | 77  | 92.0  | 2                      |
| 25.0             | 82                                                                     | 104 | 82  | 89.6  | 1                      |
| 21.3             | 149                                                                    | 115 | 71  | 111.7 | 0.5                    |
| 24.0             | 40                                                                     | 104 | 66  | 70.0  | 0.5                    |
| 22.3             | 47                                                                     | 47  | 51  | 48.3  | 1                      |
| 27.3             | 65                                                                     | 76  | 80  | 73.7  | 1                      |
| 21.7             | 44                                                                     | 54  | 49  | 49.0  | 0.5                    |
| 23.7             | 97                                                                     | 104 | 82  | 94.5  | 0.5                    |
| 17.6             | 103                                                                    | 110 | 115 | 109.3 | 1                      |
| 27.3             | 80                                                                     | 60  | 75  | 71.7  | 2                      |
| 30.3             | 94                                                                     | 100 | 102 | 98.6  | 2                      |
| 31.0             | 114                                                                    | 197 | 219 | 177.1 | 2                      |
| 16.3             | 63                                                                     | 99  | 82  | 81.3  | 0                      |
| 22.0             | 69                                                                     | 82  | 71  | 74.1  | 2                      |
| 25.3             | 34                                                                     | 27  | 31  | 30.8  | 1                      |
| 16.7             | 34                                                                     | 49  | 52  | 45.1  | 1                      |
| 12.3             | 29                                                                     | 55  | 55  | 46.1  | 1                      |
| 24.0             | 61                                                                     | 60  | 66  | 62.4  | 1                      |
| 20.4             | 40                                                                     | 66  | 66  | 57.2  | 1                      |
| 21.9             | 41                                                                     | 66  | 49  | 52.1  | 1                      |
| 25.0             | 29                                                                     | 55  | 49  | 44.3  | 1                      |
| 22.3             | 22                                                                     | 19  | 26  | 22.3  | 0.5                    |
| 26.3             | 57                                                                     | 68  | 49  | 58.2  | 0.5                    |
| 32.3             | 40                                                                     | 44  | 33  | 38.9  | 0.5                    |
